# Supplementary material
Source: Springer Nature journal article supplement (https://www.springermedizin.de/resource/supplementary/12874_2011_778_MOESM2_ESM.pdf/9432912)
Supplement: MOESM2 [file 9432912]

All articles identified through  
database searching, additional  
searches of related articles and  
citations  
(n = 106)

Records after duplicates removed  
(n = 99)

Records screened  
(n = 99)

Records excluded  
(n = 33)

Full-text articles assessed  
for eligibility  
(n = 66)

Full-text articles excluded (n = 22)

Reasons:  
Editorial/Letter/health alert (n=10)  
Not original Data (n=3)  
Not target population (n=1)  
No relevant outcome Data (n=5)  
Not required study design (n=2)  
Abstract only (n=1)

Studies included in  
qualitative synthesis  
(n = 44)
